# Supplementary material
Source: HighWire-hosted journal article supplement (https://www.genetics.org/content/suppl/2012/12/21/genetics.112.147215)
Supplement: genetics.112.147215-12.pdf [file genetics.112.147215-12.pdf]

## Extended analytical results

**S1 The variance of the total sharing****S1.1 The expected number of recent mutations on a shared segment**

Consider a segment shared IBD between two individuals. Regardless of the segment length, the two individuals are expected to differ in  $\approx 1$  site along the segment. This is because for a pair of individuals with MRCA  $g$  generations ago, the shared segment is of typical length  $100/(2g)$  cM (see, e.g., *Mean total sharing* section in the main text). The number of recent mutations per cM is  $2g\mu$ , where  $\mu$  is the mutation rate per generation per cM. The total number of differences is therefore approximately

$$\# \text{ differences} \approx \frac{100}{2g} 2g\mu = 100\mu. \quad (1)$$

For the human genome,  $\mu \approx 10^{-8}$  per generation per bp [1], or  $\approx 0.8 \cdot 10^{-2}$  per generation per cM (1MB corresponds roughly to 1.25cM). The number of difference is therefore around 1.

**S1.2 The assumptions underlying derivation of the variance of the total sharing**

We summarize below the assumptions made when calculating the mean and the variance of the total sharing (main text *Mean total sharing* and *The variance of the total sharing* sections).

1. The population is Wright-Fisher with constant (effective) size  $N$ . We do not distinguish between male and female history, and all present-day individuals are represented as random pairs of haploids from the current generation.
2. The ancestral process is described by Kingsman's coalescent [2]; specifically, time is assumed to be continuous, and the distribution of coalescence times is exponential with rate 1.
3. Recombination is a Poisson process with rate 0.01 per cM.
4. The recombination rate between markers is proportional to the genetic distance between the them.
5. The markers are equally spaced, in genetic distance, along each chromosome and are dense enough, that when calculating the probability that a segment has length  $\geq m$ , we can ignore the discreteness of the markers.
6. If two sites are on different chromosomes, they are shared or not independently of each other.
7. Boundary effects at the ends of the chromosomes are ignored.
8. We assume that the events that two sites are in shared segments are independent once we specify the time to the MRCA at each site.

Assumptions 1, 2, 3, and 4 are standard when studying finite, isolated populations [2]. Assumption 5 should present no problem in practice, with SNP arrays covering over a million sites or with whole-genome sequences. For assumption 6, we can, approximately, expect segments on different chromosomes to be shared independently of each other if the individuals are sufficiently unrelated that the average number of segments shared genome-wide is less than one, which is true for 4th (half-) cousins or less related individuals [3]. Assumption 7 is reasonable when  $L \gg m$  ( $L$  is the length of the chromosome,  $m$  is the minimal segment length).

For the last assumption (8), one may suggest that if there was no recombination event in the history of two sites, then they are not independent. The reason why our approximation works is that when the two sites have the same coalescence time, it is usually very short (otherwise there would have been a recombination event and the coalescence times would not be the same in the two sites), increasing the probability that they lie on shared segments. If the sites have different coalescence times, the times would tend to be longer, reducing the probability that the sites are on shared segments, in accordance with the fact that they were separated by a recombination event.

One importance of the derivation presented in the main text is that it sets the framework for a more detailed calculation that eliminates the last assumption. It does so by conditioning the probability  $\pi_2(s_1, s_2)$  on whether or not there was a recombination event. For each case, it then proceeds using the Markov chain representation of coalescent with recombination. This is explained in the next subsection.

### S1.3 An alternative calculation of the variance of the total sharing

In this subsection, we recalculate the probability  $\pi_2(s_1, s_2) = \pi_2(k)$  of two sites separated by  $k$  markers to be both on shared segments of length  $\geq m$ . We use the Markov chain illustrated in Figure 1 of the main text as well as other notation as used in the main text. As mentioned above, we calculate  $\pi_2$  by conditioning on whether or not the two sites have been separated by a recombination event,

$$\pi_2 = p_{\text{nr}}\pi_{\text{nr}} + (1 - p_{\text{nr}})\pi_{\text{r}}, \quad (2)$$

where  $p_{\text{nr}}$  is the probability of no recombination,  $\pi_{\text{nr}}$  is the probability of both sites to be in shared segments when there was no recombination, and  $\pi_{\text{r}}$  is the probability of both sites to be in shared segments when there was recombination.

To calculate the probability of no recombination, we consider the discrete time Wright-Fisher model (as we found that it matches better the discrete-time simulations). In discrete time, the PDF of  $g$ , the number of generations to the (single-site) MRCA, is geometric,  $P(g) = \frac{1}{N} \left(1 - \frac{1}{N}\right)^{g-1}$ . Given an MRCA at generation  $g$  at one site, we require that there was no recombination between that site and the other site, in both chromosomes, and in all  $g$  generations. Because recombination is a Poisson process and the distance between the sites is  $d = k \frac{L}{M}$ , there will be no recombination with probability

$$p_{\text{nr}} = \sum_{g=1}^{\infty} \frac{1}{N} \left(1 - \frac{1}{N}\right)^{g-1} e^{-dg/50} = \frac{1}{1 + N(e^{d/50} - 1)}. \quad (3)$$

The scaled recombination rate  $\rho$  was defined as in the main text as  $\rho = 2Nd/100$  [4].

Consider now the no-recombination probability,  $\pi_{\text{nr}}$ . As long as  $d \geq m$ ,  $\pi_{\text{nr}}$  is trivially 1. If  $d < m$ , the segment spanning the two sites is of length  $d + \ell_{1L} + \ell_{2R}$ , where  $\ell_{1L}$  is the distance to the next recombination event to the *left of the left marker*, and similarly for  $\ell_{2R}$  (see Figure 1 for illustration). Given that the coalescence time (at both sites) was  $t$ , both  $\ell_{1L}$  and  $\ell_{2R}$  are exponentially distributed with rate  $2Nt/100$ . The PDF of the coalescence time is  $\Phi(t) = (1 + \rho)e^{-(1+\rho)t}$ , since this is the PDF of the time to exit state 1, and we are given that there was no recombination before coalescence. Therefore,

$$\pi_{\text{nr}; d < m} = \int_0^{\infty} (1 + \rho)e^{-(1+\rho)t} dt \int_{m-d}^{\infty} \left(\frac{Nt}{50}\right)^2 \ell e^{-Nt\ell/50} d\ell. \quad (4)$$

These integrals are easily solvable, giving

$$\pi_{\text{nr}} = \begin{cases} 1 - \left[ \frac{N(m-d)}{N(m-d) + 50(1+\rho)} \right]^2 & d < m, \\ 1 & d \geq m. \end{cases} \quad (5)$$

It is easy to see that  $\lim_{d \rightarrow m^+} \pi_{\text{nr}} = \lim_{d \rightarrow m^-} \pi_{\text{nr}}$ , as expected.

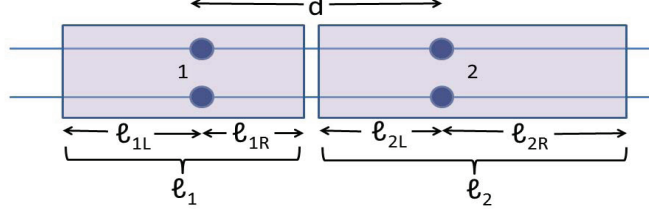

Figure 1: An illustration of the shared segments spanning two sites (numbered 1 and 2). Lines correspond to chromosomes and circles to sites, which are distance  $d$  apart. The shaded boxes correspond to hypothetical shared segments. The left segment extends to distance  $\ell_{1R}$  to the right of the site and  $\ell_{1L}$  to the left of it, and similarly for the right segment.

The case of recombination is more complicated. One might think that if there was a recombination event in the history of the two sites, then the two sites will be shared (or not independently). However, the presence of a recombination event implies that the sum of  $\ell_{1R}$  and  $\ell_{2L}$  [(the segment length to the right of the left marker) and (the segment length to the left of the right marker)] cannot exceed  $d$  (see Figure 1 for illustration). We simplify the analysis by assuming instead that each of those two segments cannot exceed length  $d$ , but that their lengths are otherwise independent, resulting in a slight overestimation of  $\pi_r$ . Thus, for a given time to MRCA,  $t_1$ , the segment length spanning the left site can be written as  $\ell_1 = \ell_{1L} + \ell_{1R}$  (see Figure 1), where  $\ell_{1L}$  is distributed exponentially with rate  $Nt_1/50$ ,

$$P(\ell_{1L}) = \frac{Nt_1}{50} e^{-\frac{Nt_1 \ell_{1L}}{50}} \quad ; \quad \ell_{1L} > 0, \quad (6)$$

and  $\ell_{1R}$  is similarly distributed, except for an upper cutoff at  $\ell_{1R} = d$ ,

$$P(\ell_{1R}) = \frac{\frac{Nt_1}{50} e^{-\frac{Nt_1 \ell_{1R}}{50}}}{1 - e^{-\frac{Nt_1 d}{50}}} \quad ; \quad 0 < \ell_{1R} < d. \quad (7)$$

Using convolution, the probability density function of  $\ell_1 = \ell_{1L} + \ell_{1R}$  is

$$P(\ell_1) = \frac{\left(\frac{Nt_1}{50}\right)^2 e^{-\frac{Nt_1 \ell_1}{50}}}{1 - e^{-\frac{Nt_1 d}{50}}} \cdot \begin{cases} d & \ell_1 < d, \\ \ell_1 & \ell_1 \geq d. \end{cases} \quad (8)$$

The probability that  $\ell_1 \geq m$  and thus the site is on a shared segment is

$$P(\ell_1 > m) = \frac{1}{1 - e^{-\frac{Nt_1 d}{50}}} \cdot \begin{cases} d \frac{Nt_1}{50} e^{-\frac{Nt_1 m}{50}} & d < m, \\ \left(1 + m \frac{Nt_1}{50}\right) e^{-\frac{Nt_1 m}{50}} - e^{-\frac{Nt_1 d}{50}} & d \geq m. \end{cases} \quad (9)$$

For large  $d$ ,  $P(\ell_1 > m) \rightarrow \left(1 + m \frac{Nt_1}{50}\right) e^{-\frac{Nt_1 m}{50}}$ , which is exactly the single-site expression (Eq. (1) in the main text), as expected. We then simplify again by approximating the denominator of  $P(\ell_1 > m)$  with 1,

$$P(\ell_1 > m) \approx \begin{cases} d \frac{Nt_1}{50} e^{-\frac{Nt_1 m}{50}} & d < m, \\ \left(1 + m \frac{Nt_1}{50}\right) e^{-\frac{Nt_1 m}{50}} - e^{-\frac{Nt_1 d}{50}} & d \geq m. \end{cases} \quad (10)$$

This should lead to a slight underestimation of  $\pi_r$ . From here on the calculation is exact. An equation identical to (10) holds for  $P(\ell_2 > m)$ . Integrating the probabilities of the two sites to be in shared segments over all possible coalescence times, we have, for  $d < m$ ,

$$\pi_r = \int_0^\infty \int_0^\infty \Phi(t_1, t_2) d \frac{Nt_1}{50} e^{-\frac{Nt_1 m}{50}} d \frac{Nt_2}{50} e^{-\frac{Nt_2 m}{50}} dt_1 dt_2. \quad (11)$$

For  $d \geq m$ ,

$$\pi_r = \int_0^\infty \int_0^\infty \Phi(t_1, t_2) \left[ \left(1 + m \frac{Nt_1}{50}\right) e^{-\frac{Nt_1 m}{50}} - e^{-\frac{Nt_1 d}{50}} \right] \left[ \left(1 + m \frac{Nt_2}{50}\right) e^{-\frac{Nt_2 m}{50}} - e^{-\frac{Nt_2 d}{50}} \right] dt_1 dt_2. \quad (12)$$

As in the main text, this can be rewritten naturally in terms of the Laplace transform of  $\Phi$ ,

$$\widehat{\Phi}(q_1, q_2) = \int_0^\infty \int_0^\infty e^{-q_1 t_1 - q_2 t_2} \Phi(t_1, t_2) dt_1 dt_2. \quad (13)$$

After some algebra, we find, for  $d < m$ ,

$$\pi_r = d^2 \left[ \frac{\partial}{\partial m_1} \frac{\partial}{\partial m_2} \widehat{\Phi} \left( \frac{m_1 N}{50}, \frac{m_2 N}{50} \right) \right]_{\substack{m_1=m \\ m_2=m}}. \quad (14)$$

For  $d \geq m$ ,

$$\begin{aligned} \pi_r = & \widehat{\Phi} \left( \frac{mN}{50}, \frac{mN}{50} \right) - 2m \left[ \frac{\partial}{\partial m_1} \widehat{\Phi} \left( \frac{m_1 N}{50}, \frac{mN}{50} \right) \right]_{m_1=m} + m^2 \left[ \frac{\partial}{\partial m_1} \frac{\partial}{\partial m_2} \widehat{\Phi} \left( \frac{m_1 N}{50}, \frac{m_2 N}{50} \right) \right]_{\substack{m_1=m \\ m_2=m}} \\ & + \widehat{\Phi} \left( \frac{dN}{50}, \frac{dN}{50} \right) - 2\widehat{\Phi} \left( \frac{mN}{50}, \frac{dN}{50} \right) + 2m \left[ \frac{\partial}{\partial m_1} \widehat{\Phi} \left( \frac{m_1 N}{50}, \frac{dN}{50} \right) \right]_{m_1=m}. \end{aligned} \quad (15)$$

We are therefore left only with finding  $\widehat{\Phi}(q_1, q_2)$ . This can be carried out almost as in the main text, except that we must take into account that there was recombination before coalescence, that is, the Markov chain jumped from the initial state 1 to state 2 and not to state 8. Therefore, the coalescence times at the two sites,  $t_1$  and  $t_2$ , can be seen as a sum of  $t'$ , the time it took to jump from state 1 to state 2, and the times it took from state 2 until coalescence events occurred in both sites. As we explained just before Eq. (4), the time it takes to jump from state 1 to state 2, given recombination, is distributed exponentially with rate  $(1 + \rho)$ . Therefore,

$$\Phi(t_1, t_2) dt_1 dt_2 = \begin{cases} \int_0^{t_1} (1 + \rho) e^{-(1+\rho)t'} P_{21}(t_1 - t') \delta(t_2 - t_1) dt' dt_1 dt_2 & t_1 = t_2, \\ \int_0^{t_1} (1 + \rho) e^{-(1+\rho)t'} [P_{22}(t_1 - t') + P_{23}(t_1 - t')] e^{-(t_2 - t_1)} dt' dt_1 dt_2 & t_1 < t_2, \\ \int_0^{t_2} (1 + \rho) e^{-(1+\rho)t'} [P_{22}(t_2 - t') + P_{23}(t_2 - t')] e^{-(t_1 - t_2)} dt' dt_1 dt_2 & t_2 < t_1. \end{cases} \quad (16)$$

In the last equation,  $P_{2i}(t)$  is the probability of the chain to be at state  $i$  at time  $t$ , given that it started at state 2. The reasoning behind the last equation is as follows. In the case  $t_1 = t_2$ , to coalesce at both sites at time  $t_1$ , we need to wait time  $t'$  to jump to state 2, then be back in state 1 after another period of  $(t_1 - t')$  (probability  $P_{21}(t_1 - t')$ ), and then jump to state 8 (probability  $dt_1$ ). To coalesce at site 1 (the left one) only at time  $t_1$ , we need to wait time  $t'$  to get to state 2, and then be at state 2 (or 3) at time  $(t_1 - t')$  (probability  $P_{22}(t_1 - t')$  or  $P_{23}(t_1 - t')$ ) and jump to state 5 (or 7; probability  $dt_1$ ). Then, coalescence at site 2 (the right one) at time  $t_2 > t_1$  occurs with probability  $e^{-(t_2 - t_1)} dt_2$ . The case  $t_1 > t_2$  is similarly explained. Taking the Laplace transform of the last equation,

$$\begin{aligned} \widehat{\Phi}(q_1, q_2) = & \int_0^\infty \int_0^\infty e^{-q_1 t_1 - q_2 t_2} \int_0^{t_1} (1 + \rho) e^{-(1+\rho)t'} P_{21}(t_1 - t') \delta(t_2 - t_1) dt' dt_1 dt_2 \\ & + \int_0^\infty \int_{t_1}^\infty e^{-q_1 t_1 - q_2 t_2} \int_0^{t_1} (1 + \rho) e^{-(1+\rho)t'} [P_{22}(t_1 - t') + P_{23}(t_1 - t')] e^{-(t_2 - t_1)} dt' dt_2 dt_1 \\ & + \int_0^\infty \int_{t_2}^\infty e^{-q_1 t_1 - q_2 t_2} \int_0^{t_2} (1 + \rho) e^{-(1+\rho)t'} [P_{22}(t_2 - t') + P_{23}(t_2 - t')] e^{-(t_1 - t_2)} dt' dt_1 dt_2. \end{aligned} \quad (17)$$

The first term of the right-hand-side can be solved as follows,

$$\begin{aligned} & \int_0^\infty \int_0^\infty e^{-q_1 t_1 - q_2 t_2} \int_0^{t_1} (1 + \rho) e^{-(1+\rho)t'} P_{21}(t_1 - t') dt' dt_1 \delta(t_2 - t_1) dt_2 = \\ & (1 + \rho) \int_0^\infty e^{-(q_1 + q_2)t_1} \left[ \int_0^{t_1} e^{-(1+\rho)t'} P_{21}(t_1 - t') dt' \right] dt_1 = \\ & \frac{1 + \rho}{1 + \rho + q_1 + q_2} \widehat{P}_{21}(q_1 + q_2). \end{aligned} \quad (18)$$

The last line results from the special structure of the integrals in the second line: the internal integral is a convolution between  $e^{-(1+\rho)t}$  and  $P_{21}(t)$ , and the external integral is the Laplace transform  $t_1 \rightarrow (q_1 + q_2)$  of the internal integral. Applying the convolution theorem (recalling that the Laplace transform of  $e^{-at}$  is  $(a + q)^{-1}$ ), we arrive at the last line. The second and third terms of Eq. (17) require more algebra but are solved similarly, finally giving

$$\widehat{\Phi}(q_1, q_2) = \frac{1 + \rho}{1 + \rho + q_1 + q_2} \left\{ \left( \frac{1}{1 + q_1} + \frac{1}{1 + q_2} \right) \left[ \widehat{P}_{22}(q_1 + q_2) + \widehat{P}_{23}(q_1 + q_2) \right] + \widehat{P}_{21}(q_1 + q_2) \right\}. \quad (19)$$

By that we are almost done, since as in the main text, the Laplace transform of the transition probabilities  $\widehat{P}_{2i}(q)$  can be readily found using the continuous-time Markov chain relation

$$\widehat{P}_{2i}(q) = (qI - Q)_{2i}^{-1}, \quad (20)$$

where  $Q$  is the transition rate matrix of the chain. Substituting, using MATHEMATICA, Eq. (20) in Eq. (19) gives

$$\widehat{\Phi}(q_1, q_2) = \frac{(1 + \rho) \{ 2(6 + q)[3 + q_1(4 + q_1) + q_2(4 + q_2) + 3q_1q_2] + \rho(2 + q)(13 + 3q) + \rho^2(2 + q) \}}{(1 + q_1)(1 + q_2)(1 + q + \rho)[2(1 + q)(3 + q)(6 + q) + \rho(2 + q)(13 + 3q) + \rho^2(2 + q)]}, \quad (21)$$

where  $q = q_1 + q_2$ . We then substituted, again using MATHEMATICA, Eq. (21) in Eqs. (14) and (15) to obtain the final expression for  $\pi_r$ . We verified numerically that  $\lim_{d \rightarrow m^+} \pi_r = \lim_{d \rightarrow m^-} \pi_r$ . Eq. (5) for  $\pi_{nr}$ , Eq. (3) for  $p_{nr}$ , and Eq. (2) for  $\pi_2$  complete the derivation.

#### S1.4 An alternative derivation of $\widehat{\Phi}(q_1, q_2)$ using the Feynman-Kac formula

In this subsection, we show how  $\widehat{\Phi}(q_1, q_2)$  (Eq. (11) in the main text and Eq. (21) here) can be derived using the Feynman-Kac formula as described by Fitzsimmons and Pitman [5]. We thank an anonymous reviewer for pointing out this approach.

Let us start with Eq. (11) in the main text. Assume the same continuous-time Markov chain as in the main text, and define a *functional* of the Markov chain as  $A_v = \int_0^T v(X_t) dt$ , where  $X_t$  is the state of the chain at time  $t$ ,  $T$  is the “killing” time when the chain reaches an absorbing state (in our case, state no. 8), and  $v(x)$  assigns a value to each state. With this notation, the Laplace transform  $\widehat{\Phi}(q_1, q_2)$  (for the case analyzed in the main text, when there is no restriction on the first transition) can be written as

$$\widehat{\Phi}(q_1, q_2) = \int_0^\infty \int_0^\infty e^{-q_1 t_1 - q_2 t_2} \Phi(t_1, t_2) dt_1 dt_2 = \langle e^{A_v} \rangle, \quad (22)$$

with  $v = -(q_1 + q_2, q_1 + q_2, q_1 + q_2, q_1, q_2, q_1, q_2)^T$ . This is true, because the left-site coalescence time  $t_1$  is the total time spent by the chain in states 1,2,3,4, and 6, whereas the right-site coalescence time  $t_2$  is the total time spent in 1,2,3,5, and 7.

According to the Feynman-Kac formula [5],

$$\widehat{\Phi}(q_1, q_2) = \langle e^{A_v} \rangle = \lambda(Q' + M_v)^{-1} Q' \mathbf{1}, \quad (23)$$

where  $M_v = \text{diag}(v)$ ,  $\lambda$  is the initial condition (in our case,  $\lambda = (1, 0, 0, 0, 0, 0, 0)$ , since the chain always starts at state 1), and  $\mathbf{1} = (1, 1, 1, 1, 1, 1, 1)^T$ . The matrix  $Q'$  is obtained from the transition rate matrix  $Q$  by removing the row and column corresponding to the absorbing state (state 8). Carrying out the necessary matrix multiplications and inversions, we obtain the exact same expression as in Eq. (11) in the main text.

In the case analyzed in Section S1.3 above (leading eventually to Eq. (21)), the chain is guaranteed to jump from state 1 to state 2 (but not to state 8) at rate  $(1 + \rho)$ . This can be incorporated into the Feynman-Kac framework by extending the chain to include a “ghost” state 0, from which the only outward transition is to state 2, at rate  $(1 + \rho)$ . No transitions are allowed into state 0, and it is the initial state of the chain. Since neither site has coalesced while in state 0, we can write  $\widehat{\Phi}(q_1, q_2) = \langle e^{A_v} \rangle$  with  $v = -(q_1 + q_2, q_1 + q_2, q_1 + q_2, q_1 + q_2, q_1, q_2, q_1, q_2)^T$ . We then use  $\langle e^{A_v} \rangle = \lambda(Q'' + M_v)^{-1}Q''\mathbf{1}$ , where  $\lambda = (1, 0, 0, 0, 0, 0, 0, 0)$  and  $Q''$  is equal to  $Q'$ , but with an additional row and an additional column for the new state 0:

$$Q'' = \begin{pmatrix} -1 - \rho & 0 & 1 + \rho & 0 & 0 & 0 & 0 & 0 & 0 \\ 0 & & & & & & & & \\ 0 & & & & & & & & \\ 0 & & & & & & & & \\ 0 & & & & Q' & & & & \\ 0 & & & & & & & & \\ 0 & & & & & & & & \\ 0 & & & & & & & & \end{pmatrix}. \quad (24)$$

Solving and simplifying gives Eq. (21).

## S1.5 A linearly expanding population

In this subsection we calculate the mean and the variance of the total sharing for a linearly expanding population. Define the population size as  $N(t) = N_0\lambda(t)$ , where

$$\lambda(t) = \begin{cases} 1 + \tilde{r}(t_0 - t) & 0 \leq t \leq t_0, \\ 1 & t > t_0. \end{cases} \quad (25)$$

This corresponds to a population maintaining a constant size until  $t = t_0$  generations ago; starting at  $t = t_0$  and until present, the population grows linearly at rate  $\tilde{r}$ . The PDF of the coalescence times is

$$\Phi(t) = \frac{e^{-\int_0^t \frac{dt'}{\lambda(t')}}}{\lambda(t)}. \quad (26)$$

Substituting  $\lambda(t)$  from Eq. (25), we have, for  $t \leq t_0$ ,

$$\begin{aligned} \Phi(t) &= \frac{1}{1 + \tilde{r}(t_0 - t)} \exp \left[ - \int_0^t \frac{dt'}{1 + \tilde{r}(t_0 - t')} \right] \\ &= \frac{1}{1 + \tilde{r}(t_0 - t)} \exp \left\{ \frac{1}{\tilde{r}} \ln \left[ \frac{1 + \tilde{r}(t_0 - t)}{1 + \tilde{r}t_0} \right] \right\} \\ &= (1 + \tilde{r}t_0)^{-1/\tilde{r}} [1 + \tilde{r}(t_0 - t)]^{1/\tilde{r}-1}. \end{aligned} \quad (27)$$

For  $t > t_0$ ,

$$\begin{aligned} \Phi(t) &= \exp \left[ - \int_0^{t_0} \frac{dt'}{1 + \tilde{r}(t_0 - t')} - \int_{t_0}^t dt' \right] \\ &= \exp \left[ \frac{1}{\tilde{r}} \ln \left( \frac{1}{1 + \tilde{r}t_0} \right) - (t - t_0) \right] \\ &= (1 + \tilde{r}t_0)^{-1/\tilde{r}} e^{-(t-t_0)}. \end{aligned} \quad (28)$$

In summary,

$$\Phi(t) = (1 + \tilde{r}t_0)^{-1/\tilde{r}} \begin{cases} [1 + \tilde{r}(t_0 - t)]^{1/\tilde{r}-1} & 0 \leq t \leq t_0 \\ e^{-(t-t_0)} & t > t_0 \end{cases}. \quad (29)$$

We then use Eq. (17) from the main text for the mean total sharing,

$$\langle f_T \rangle = \int_0^\infty \Phi(t) \left(1 + \frac{mN_0t}{50}\right) e^{-\frac{mN_0t}{50}} dt, \quad (30)$$

and Eq. (19) from the main text for the variance of the total sharing,

$$\text{Var}[f_T] \approx 2 \int_{m/L}^1 (1-x) \left[ \int_0^\infty \Phi(t) e^{-txN_0L/50} dt \right] dx. \quad (31)$$

The integral in  $\langle f_T \rangle$  and the internal integral (over  $t$ ) in  $\text{Var}[f_T]$  can be evaluated in terms of incomplete Gamma functions (not shown). For  $\text{Var}[f_T]$ , the external integral must be evaluated numerically. [We also tried to change the order of the integration in Eq. (31), that is, to compute the integral over  $x$  first. However, in that case, while the integral over  $x$  was solvable, the integral over  $t$  was not.] We compare the results of Eqs. (30) and (31) to simulations in Figure **S1**. In the simulations, the ancestral population size was set to  $N_a = 10000$ , the expansion started  $E_t = 500$  generations ago, and the final (current) population size varied in the range  $N_c = [10500, 15000]$ . In terms of the parameters of  $\lambda(t)$ , this corresponds to  $N_0 = N_a = 10000$ ,  $t_0 = 500/10000 = 0.05$ , and  $\tilde{r}$  between  $(1.05 - 1)/0.05 = 1$  and  $(1.5 - 1)/0.05 = 10$ . The comparison shows reasonable agreement with deviation of up to about 10%.

## S2 The distribution of the total sharing

This section provides some additional results and discussion on *The total sharing distribution and an error model* section in the main text, in which an approximation to the distribution of the total sharing was presented.

### S2.1 A bound on the probability of no sharing

A bound on the probability of no sharing,  $P(f_T = 0)$ , can be obtained directly from the one-sided Chebyshev inequality,

$$P(f_T \leq \langle f_T \rangle - a) \leq \frac{\sigma_{f_T}^2}{\sigma_{f_T}^2 + a^2}. \quad (32)$$

Substituting  $a = \langle f_T \rangle$  and noting that  $P(f_T \leq 0) = P(f_T = 0)$  immediately gives

$$P(f_T = 0) \leq \frac{\sigma_{f_T}^2}{\sigma_{f_T}^2 + \langle f_T \rangle^2}. \quad (33)$$

In practice, however, this bound is not very tight, as can be seen in Figure **S3**.

### S2.2 IBD calculations in the founder model

*The total sharing distribution and an error model* section in the main text presented results for the distribution of total sharing assuming it is a sum of a Poisson distributed number of segments. Early calculations of the distribution of the total sharing were performed in a different population model, where a group of unrelated individuals is assumed to have recently founded the population. The distribution of the total length of the IBD shared segments was calculated, under somewhat strong assumptions, using renewal theory [6, 7]. In their model, it was assumed that if a region is not shared IBD, it is fully heterozygous (because it is

derived from different founders). In reality, however, all segments descend from a common ancestor at some point in the past, but the common ancestor of some segments is so ancient that they are too short to be detected. Our coalescent-based approach takes just that into account, by considering as IBD only segments longer than a certain length threshold.

### S2.3 Matching the Poisson and exponential parameters

The parameters of the Poisson approximation, Eq. (24) in the main text, can be obtained by matching the first two moments of the total sharing distribution. The mean and variance of the Poisson approximation are given by (see, e.g., the main text Eq. (25))

$$\begin{aligned}\langle L_T \rangle &= n_0(\ell_0 + m) = L \langle f_T \rangle, \\ \text{Var}[L_T] &= n_0[\ell_0^2 + (\ell_0 + m)^2] = L^2 \sigma_{f_T}^2,\end{aligned}\tag{34}$$

where  $\langle f_T \rangle$  is given in the main text Eq. (4) and  $\sigma_{f_T}$  is given by one of the previously calculated approximations, e.g., the main text Eq. (15). Solving for  $n_0$  and  $\ell_0$  in terms of  $\langle f_T \rangle$  and  $\sigma_{f_T}$  gives

$$\begin{aligned}\ell_0 &= \frac{L\sigma_{f_T}^2 - 2\langle f_T \rangle m + \alpha}{4\langle f_T \rangle}, \\ n_0 &= \frac{L\sigma_{f_T}^2 + 2\langle f_T \rangle m - \alpha}{2m^2/L},\end{aligned}\tag{35}$$

where  $\alpha = \left(4\langle f_T \rangle Lm\sigma_{f_T}^2 + L^2\sigma_{f_T}^4 - 4\langle f_T \rangle^2 m^2\right)^{1/2}$ . In practice, we found that using Eq. (35) matched well the distribution  $P(f_T)$  only when we underestimated  $\sigma_{f_T}$  by 20-30%, probably because of the absence of the broad tail in Eq. (24). Therefore, in Figures 4 in the main text and **S2** here we used the fitted values of  $n_0$  and  $\ell_0$ .

## S3 An estimator of the population size

In this subsection, we derive Eq. (39) in the main text for the variance of an estimator of the population size that is based on the average sharing between all pairs in a cohort. For a cohort of size  $n$ , define  $\overline{\overline{f_T}} = \sum_{i=1}^n \sum_{j>i}^n f_T^{(i,j)} / \binom{n}{2}$ , or

$$\overline{\overline{f_T}} = \frac{f_T^{(1,2)} + f_T^{(1,3)} + \dots + f_T^{(1,n)} + f_T^{(2,3)} + \dots + f_T^{(2,n)} + \dots + f_T^{(n-1,n)}}{\binom{n}{2}}.\tag{36}$$

The estimator takes the form

$$\hat{N} = \frac{100}{m\overline{\overline{f_T}}} - \frac{75}{m}.\tag{37}$$

The SD of  $\hat{N}$  can be approximated as in the main text,

$$\sigma_{\hat{N}} \approx \frac{100}{m} \frac{\sigma_{\overline{\overline{f_T}}}}{\langle \overline{\overline{f_T}} \rangle^2}.\tag{38}$$

In fact, this approximation is better justified here than in the main text, as the distribution of  $\overline{\overline{f_T}}$  is much narrower than that of  $f_T$ . Using  $\langle \overline{\overline{f_T}} \rangle = \langle f_T \rangle \approx 100/(mN)$  gives

$$\sigma_{\hat{N}} \approx \frac{mN^2\sigma_{\overline{\overline{f_T}}}}{100}.\tag{39}$$



We therefore need to calculate the variance of  $\overline{f_T}$ , from which we will then obtain the standard deviation  $\sigma_{\overline{f_T}}$ . The variance of  $\overline{f_T}$  can be written as

$$\text{Var}[\overline{f_T}] = \text{var term} + \text{cov term}, \quad (40)$$

where the var term corresponds to the variances of the individual terms in the sum in the definition of  $\overline{f_T}$  (Eq. (36)), and the cov term corresponds to the covariances of these terms. More concretely, using Eq. (36),

$$\text{var term} = \frac{\binom{n}{2}\sigma_{f_T}^2}{\binom{n}{2}^2} = \frac{\sigma_{f_T}^2}{\binom{n}{2}} \approx \frac{2\sigma_{f_T}^2}{n^2} \approx \frac{2 \cdot 100}{n^2 NL} \ln\left(\frac{L}{m}\right), \quad (41)$$

where we used Eq. (15) in the main text for  $\sigma_{f_T}^2$ . The covariance term is

$$\text{cov term} = \frac{\sum_{(i,j), i \neq j} \sum_{(k,l) \neq (i,j), k \neq l} \text{Cov}\left[f_T^{(i,j)}, f_T^{(k,l)}\right]}{\binom{n}{2}^2}. \quad (42)$$

Note that the set  $(i, j, k, l)$  must have at least three distinct indexes. In most combinations of  $(i, j, k, l)$ , we will have all  $i, j, k, l$  different, for which we assume that the covariance  $\text{Cov}\left[f_T^{(i,j)}, f_T^{(k,l)}\right]$  is zero. We therefore have to consider only covariances of the form  $\text{Cov}\left[f_T^{(i,j)}, f_T^{(i,k)}\right]$  and  $\text{Cov}\left[f_T^{(i,j)}, f_T^{(j,k)}\right]$ . Since for each pair  $(i, j)$  (from which we have  $\binom{n}{2}$ ) there are  $(n-2)$  possible  $ks$ , we have

$$\text{cov term} \approx \frac{\binom{n}{2}2(n-2)\text{Cov}\left[f_T^{(1,2)}, f_T^{(1,3)}\right]}{\binom{n}{2}^2} \approx \frac{4\text{Cov}\left[f_T^{(i,j)}, f_T^{(i,k)}\right]}{n} \approx \frac{4 \cdot 10000}{nN^2mL}, \quad (43)$$

where we used Eq. (27) in the main text for  $\text{Cov}\left[f_T^{(1,2)}, f_T^{(1,3)}\right]$ . In total, the variance of  $\overline{f_T}$  is

$$\text{Var}[\overline{f_T}] \approx \frac{2 \cdot 100}{n^2 NL} \ln\left(\frac{L}{m}\right) + \frac{4 \cdot 10000}{nN^2mL} = \frac{400}{nNL} \left[ \frac{\ln\left(\frac{L}{m}\right)}{2n} + \frac{100}{Nm} \right], \quad (44)$$

and

$$\sigma_{\overline{f_T}} \approx \frac{20}{\sqrt{nNL}} \sqrt{\frac{\ln\left(\frac{L}{m}\right)}{2n} + \frac{100}{Nm}}. \quad (45)$$

Finally,

$$\sigma_{\hat{N}} \approx \frac{mN^2\sigma_{\overline{f_T}}}{100} \approx \frac{mN^{3/2}}{5\sqrt{nL}} \sqrt{\frac{\ln\left(\frac{L}{m}\right)}{2n} + \frac{100}{Nm}}, \quad (46)$$

which is precisely Eq. (39) in the main text.

## S4 An admixture pulse

In the main text, an approximate solution was given for the integral in Eq. (43). The full solution is:

$$\begin{aligned} \text{Var}[f_T] &\approx 2 \int_{m/L}^1 (1-x) \left[ \int_0^{T_a} e^{-t-txNL/50} dt \right] dx + 2\alpha^2 \int_{m/L}^1 (1-x) \left[ \int_{T_a}^{\infty} e^{-t-txNL/50} dt \right] dx \\ &= \frac{100}{L^2 N^2 T_a} \left\{ 50(1-\alpha^2) \left[ \exp\left(-\frac{T_a(50+NL)}{50}\right) - \exp\left(-\frac{T_a(50+Nm)}{50}\right) \right] - NT_a(L-m) \right. \\ &\quad \left. + T_a(50+NL) \ln\left(\frac{50+NL}{50+Nm}\right) + T_a(50+NL)(1-\alpha^2) \left[ E_i\left(-\frac{T_a(50+Nm)}{50}\right) - E_i\left(-\frac{T_a(50+NL)}{50}\right) \right] \right\}, \end{aligned} \quad (47)$$

where  $E_i(x)$  is the exponential integral function. To obtain the simplified equation (43) of the main text, we assumed  $T_a \ll 1$  (or  $G_a = NT_a \ll N$ ),  $m \ll L$ ,  $mNT_a \ll 50$ ,  $mN \gg 50$ , and  $LNT_a \gg 50$ , and used the series expansion of the exponential integral. For the parameters for which we plotted the simulation results, the simplified expression deviates in no more than 1% from the full expression.

Simulations for the case of pulse admixture were performed using GENOME as described in the main text, with the following population history. The initial (current) population size was set to  $N$ , followed by splitting to two populations, at generation  $G_a$ , of relative sizes  $N\alpha/(1-\alpha)$  and  $N$ , such that a fraction  $\alpha$  of the lineages descends from the first population (we could not find a way to implement the gene flow in GENOME while keeping the population size fixed). At the next generation, the first population size was reduced back to  $N$ , and the second was increased to  $10^6$ , to practically eliminate IBD sharing within the second population. At generation  $10^4$ , the two populations were merged into a single population of size  $N$ , to enable all lineages to coalesce. Simulation results are presented in Figure S10A. Each data point corresponds to 500 runs. The apparent noise for large  $\alpha$  might be due to this somewhat unnatural admixture model implementation.

## References

- [1] P. D. Keightley. Rates and fitness consequences of new mutations in humans. *Genetics*, 190:295–304, 2012.
- [2] J. Wakeley. *Coalescent Theory: An Introduction*. Roberts & Company Publishers, Greenwood Village, Colorado, USA, 2009.
- [3] A. Gusev, J. K. Lowe, M. Stoffel, M. J. Daly, D. Altshuler, J. L. Breslow, J. M. Friedman, and I. Pe'er. Whole population, genome-wide mapping of hidden relatedness. *Genome Res.*, 19:318–326, 2009.
- [4] R. R. Hudson. Properties of a neutral allele model with intragenic recombination. *Theor. Popul. Biol.*, 23:183–201, 1983.
- [5] P. J. Fitzsimmons and J. Pitman. Kac's moment formula and the Feynman-Kac formula for additive functionals of a Markov process. *Stoch. Proc. Appl.*, 79:117–134, 1999.
- [6] P. Stam. The distribution of the fraction of the genome identical by descent in finite random mating populations. *Genet. Res.*, 35:131–155, 1980.
- [7] N. H. Chapman and E. A. Thompson. A model for the length of tracts of identity by descent in finite random mating populations. *Theor. Pop. Biol.*, 64:141–150, 2003.
- [8] Y. Shen, R. Song, and I. Pe'er. Coverage tradeoffs and power estimation in the design of whole-genome sequencing experiments for detecting association. *Bioinformatics*, 27:1995–1997, 2011.

**File S2**

Supplementary Code

MATLAB code for the main results

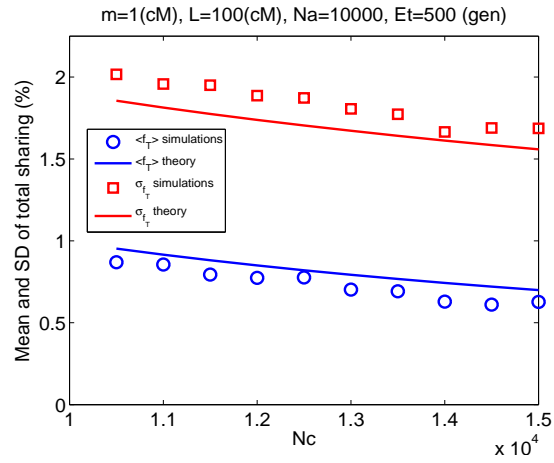

**Figure S1:** Simulation results for a linearly expanding population. Simulation results (symbols) are shown for the mean and the standard deviation (SD) of the total sharing vs. the current population size  $N_c$  for a linearly expanding population (ancestral population size  $N_a = 10000$  until time  $E_t = 500$  generations ago, then a linear expansion until the indicated current size). The theoretical curves are taken from Eq. S30 for the mean and Eq. S31 for the SD, along with Eq. S29 for the coalescence time PDF,  $\Phi(t)$ . The integrals were evaluated (analytically wherever possible; see File S1) in MATHEMATICA.

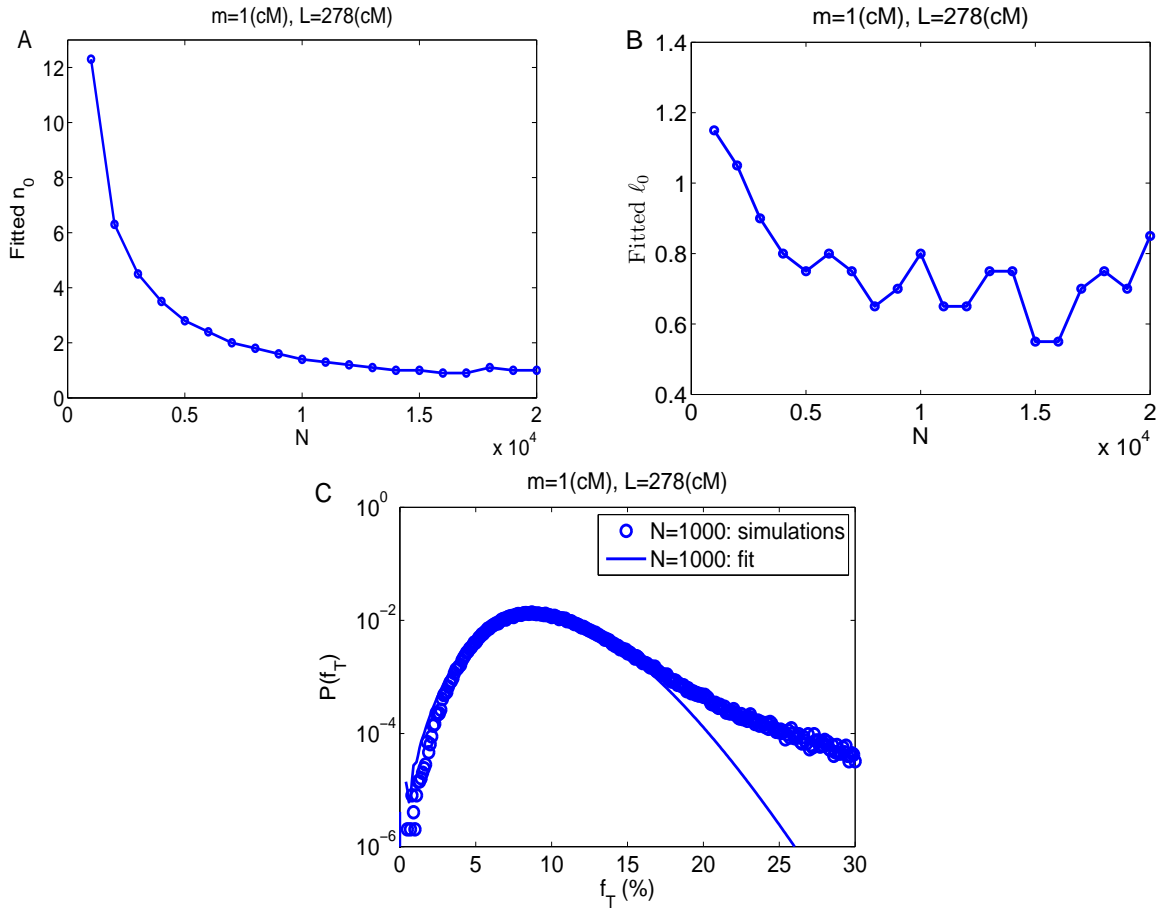

**Figure S2:** Fitting the distribution of the total sharing. (A) and (B) The fitted values of the compound Poisson parameters:  $n_0$  (A), the average number of segments, and  $\ell_0$  (B), the parameter of the shifted exponential distribution of the segment lengths ( $\ell_0 + m$  is the average segment length). The parameters, which appear in the approximate distribution of the total sharing, Eq. (24) in the main text, are plotted vs.  $N$ . Data correspond to Figures 4A and B in the main text. The figure shows that  $n_0$  roughly decreases as  $1/N$ , while  $\ell_0$  decreases for small  $N$  but then approaches a constant. (C) Same as Figure 4A in the main text, but magnified and plotted in log-scale. The fitted line, corresponding to the compound Poisson (Eq. (24) in the main text), provides a good fit to the central part of the curve, but it predicts a right tail much narrower than actually observed.

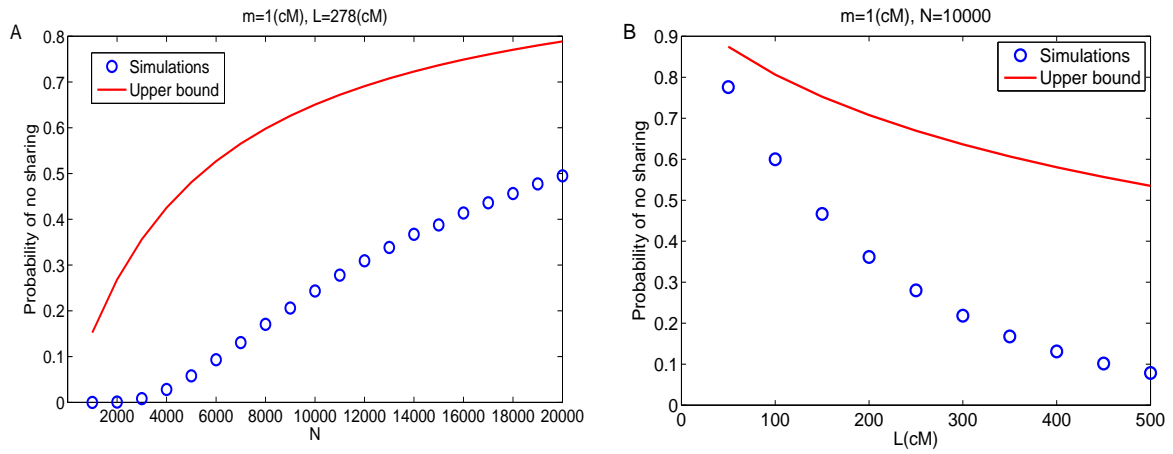

**Figure S3:** The upper bound on the probability of no sharing. Simulation results (symbols) are plotted for the fraction of pairs in the Wright-Fisher population that did not share even a single segment of length  $\geq m$ . Lines correspond to the theoretical upper bound, Eq. S33. (A) The probability of no sharing vs. the population size  $N$  (cf. Figure 2A in the main text). (B) The probability of no sharing vs. the chromosome size  $L$  (Figure 2C in the main text).

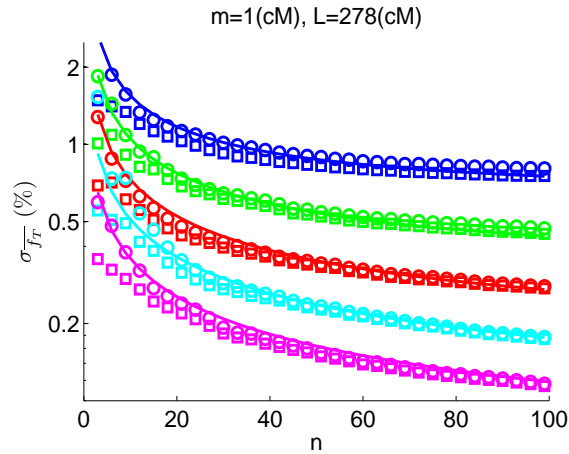

**Figure S4:** The standard deviation (SD) of the cohort-averaged sharing. Simulation results for  $\sigma_{\overline{J_T}}$ , the SD of the cohort-averaged sharing (in percentage of the genome) vs. the cohort size  $n$ . The different curves correspond to (top to bottom):  $N = 1000, 2000, 4000, 8000, 16000$ . Lines correspond to Eq. (28) of the main text. Squares: the SD of the cohort-averaged sharing within each cohort of  $n = 100$  individuals, averaged over 100 realizations of the simulations. Circles: for comparison, the data of Figure 6A of the main text, where the cohort-averaged sharing from all realizations and all individuals was first pooled, and only then the SD was calculated. For small  $n$ , the average over all realizations gives a smaller variance than when pooling, but is otherwise in agreement with the prediction. The agreement is likely because as long as  $n$  is not too small, the ancestral processes seen by different individuals in the cohort are only weakly correlated, and therefore the variance as calculated in the main text (over all ancestral processes) gives the correct result.

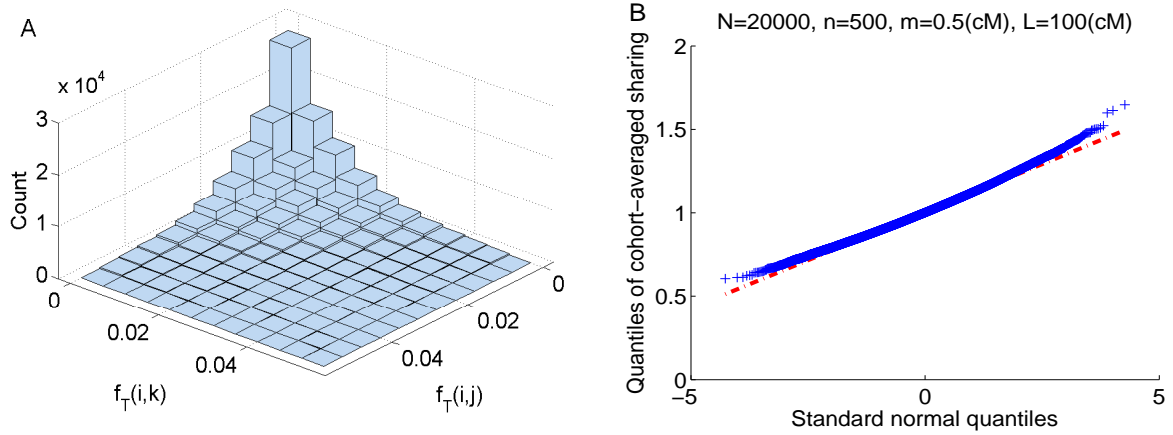

**Figure S5:** The distribution of the cohort-averaged sharing. (A) The joint distribution of the 3-way total sharing  $P\left(f_T^{(i,j)}, f_T^{(i,k)}\right)$ . To investigate whether the sharing fractions between two individuals to a third one depend on each other, we simulated the total sharing in populations with  $N = 10000$ ,  $m = 1\text{cM}$ ,  $n = 100$ , and one chromosome of length  $L = 278\text{cM}$ . For each population, we recorded all distinct values of  $f_T^{(i,j)}$  and  $f_T^{(i,k)}$  and plotted their joint histogram (after binning). The dependence is weak, but cannot be rejected based on a  $\chi^2$ -test of independence (P-value 0.12). (B) A QQ-plot of the distribution of the cohort-averaged sharing. Simulation results correspond to Figure 6B in the main text. Briefly, we calculated the distribution of the cohort-averaged sharing for populations with  $N = 20000$  individuals and one chromosome of size  $L = 100\text{cM}$ . The minimal segment length was  $m = 0.5\text{cM}$  and the cohort size was  $n = 500$ . A QQ-plot of the distribution is shown, comparing the empirical distribution to a normal one. The distribution is quite close to normal in the central part, but with a broader right tail and a narrower left tail than expected.



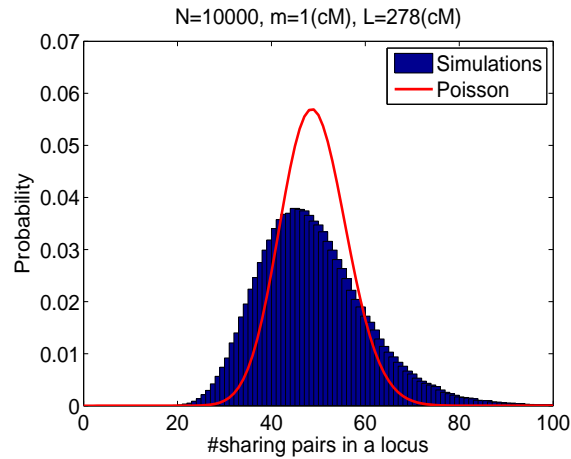

**Figure S6:** A histogram of the number of pairs sharing at each locus. We simulated 100 Wright-Fisher populations with  $N = 10000$ ,  $n = 100$ , and one chromosome of length  $L = 278\text{cM}$ , and searched for IBD shared segments using  $m = 1\text{cM}$ . In the GENOME coalescent simulator, recombination is resolved only within blocks whose size we set to  $0.01\text{cM}$ . For each such block (excluding the first and last  $m(\text{cM})$  of the chromosome), we recorded the number of pairs sharing a segment containing it, and then plotted the histogram over all blocks. We also plot a Poisson PDF with the same mean as the observed distribution. The histogram is significantly broader than the Poisson (Index-of-Dispersion test P-value less than MATLAB's resolution), indicating that sharing tends to concentrate at specific loci.

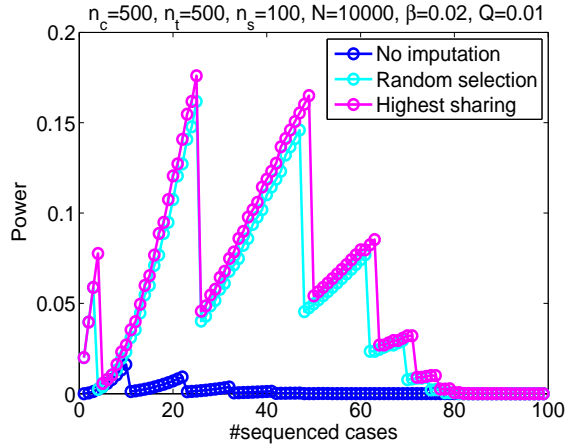

**Figure S7:** Power to detect an association when imputing by IBD. We plot the power to detect an association of a variant that exists in cases only, with and without imputation by IBD, and with sequenced individuals selected either randomly or according to their total sharing. This corresponds to the model of *Implications to sequencing study design* section in the main text. The parameters we used were:  $N = 10000$ ,  $L = 278\text{cM}$  (one chromosome),  $m = 1\text{cM}$ , cohort size of  $n_c = 500$  cases and  $n_t = 500$  controls, and a total sequencing budget of  $n_s = 100$  individuals. The carrier frequency here is  $\beta = 0.02$ , and the threshold P-value is  $Q = 0.01$ . For each number of sequenced cases (x-axis),  $n_{c,s}$  (where due to the budget limit, the number of sequenced controls is  $n_{t,s} = n_s - n_{c,s}$ ), we plot the power according to Eqs. (32), (34), (35), and (36) in the main text. The power vs.  $n_{c,s}$  has a sawtooth shape. This was also documented in [8], where the same model was analyzed. The sawtooth is an effect of the discreteness of the model. For several different values of  $n_{c,s}$  (or  $n_c^{(\text{eff})}$ , for that matter), the minimal number of carriers  $b^*$  required to reject the null hypothesis is the same, but the probability to observe that number of carriers increases with  $n_{c,s}$ . As  $n_{c,s}$  increases further,  $b^*$  finally increases by one, reducing the power dramatically.

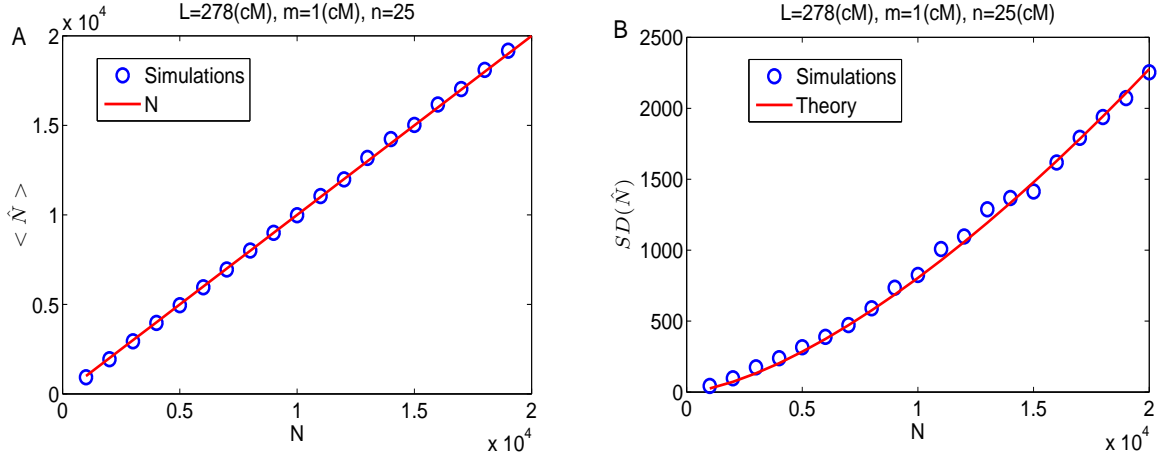

**Figure S8:** The mean and the variance of an estimator of the population size vs.  $N$ . We plot simulation results (symbols) for the estimator of the population size,  $\hat{N}$ , given in Eq. (38) in the main text. For each value of  $N$ , we simulated a number of Wright-Fisher populations and calculated the total sharing as in Figure 2A in the main text. For each of the populations simulated for each  $n$ , we divided the individuals into four disjoint groups of 25 individuals each. In each group, we calculated the mean total sharing,  $\bar{f}$ , between all  $\binom{25}{2}$  pairs. We then applied the main text Eq. (38) to calculate the population size estimator  $\hat{N}$ . Finally, for each  $N$ , we plotted the average of the estimator over all groups,  $\langle \hat{N} \rangle$  (A), as well as its standard deviation (B). In (A), we also plot the identity line ( $\langle \hat{N} \rangle = N$ ), and in (B), we also plot the theory, the main text Eq. (39).

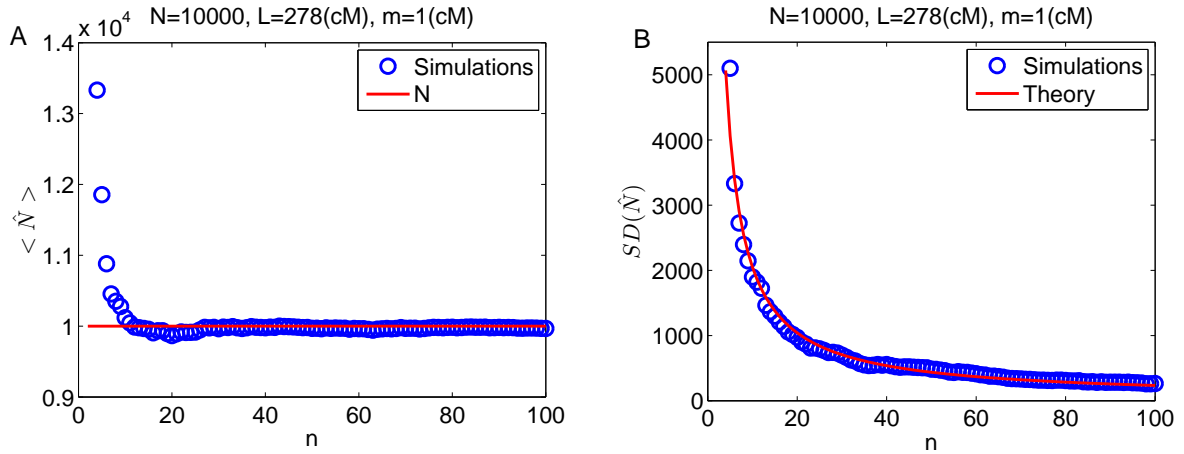

**Figure S9:** The mean and the variance of an estimator of the population size vs.  $n$ . This figure is as Figure S8, except that here the mean (A) and standard deviation (B) of the estimator  $\hat{N}$  are plotted vs. the number of individuals  $n$  and the population size is fixed,  $N = 10000$ . For each  $n$ , the total sharing between all pairs in a subset of  $n$  individuals from each population was averaged to obtain  $\bar{f}$ , and then  $\hat{N}$  was calculated according to Eq. (38) in the main text. Panel (A) also shows a horizontal line at  $\langle \hat{N} \rangle = N$ , demonstrating that  $N$  is overestimated, but only for small  $n$ . Panel (B) also shows the theoretical standard deviation from the main text Eq. (39).

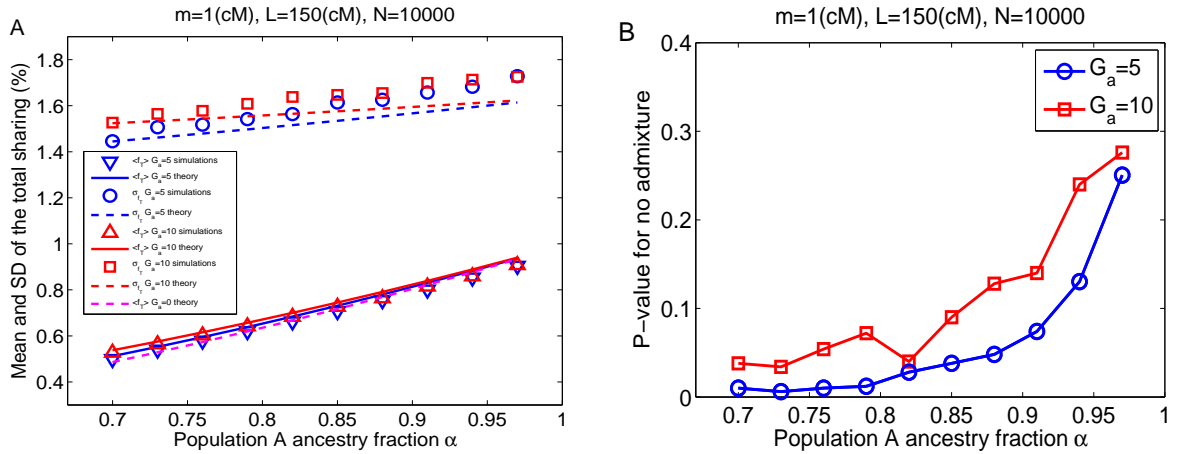

**Figure S10:** IBD sharing in an admixture pulse model. (A) Simulations were carried out for the admixture pulse model as described in the Supplementary text (File S1). The mean and the standard deviation (SD) of the total fraction of IBD sharing are plotted. Symbols correspond to simulations (triangles: mean, circles/squares: SD). Solid lines correspond to the main text Eq. (42) for the mean sharing and dashed lines to the main text Eq. (43) for the SD. Blue and red symbols/lines correspond to  $G_a = 5$  and  $G_a = 10$ , respectively. The magenta dashed line corresponds to the theoretical mean sharing if admixture has just occurred,  $G_a = 0$ . (B) P-values for the admixture test. We simulated the admixture pulse model with population size of  $N = 10000$ ,  $L = 150\text{cM}$ ,  $m = 1\text{cM}$ ,  $G_a$  equals 5 or 10, and various values of  $\alpha$ . For each  $G_a$  and  $\alpha$ , the (true) IBD shared segments were extracted and the population size was inferred as  $\hat{N} = 100/(m\overline{f_T}) - 75/m$ , where  $\overline{f_T}$  is the average fraction of sharing over all pairs. Then, 500 populations were simulated with constant size  $\hat{N}$ , and the SD of the cohort-averaged sharing was calculated. The P-value is the fraction of times the SD in the simulations was higher than the one in the admixed population.

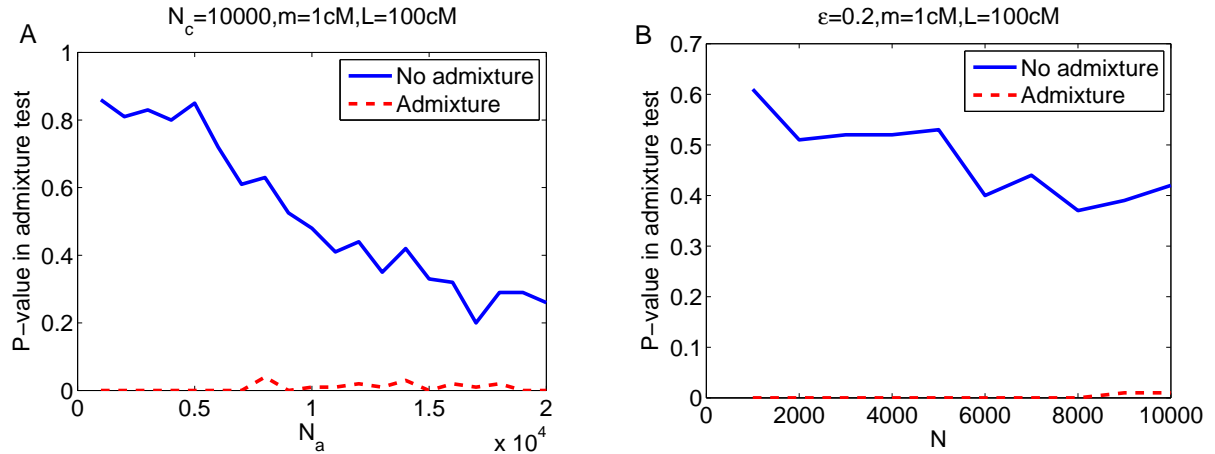

**Figure S11:** The effect of possible confounders on the admixture test. (A) The effect of a variable population size. We simulated a simple two-size population history, with ancestral population size  $N_a$  until  $T = 50$  generations ago, followed by population size of  $N_c = 10000$  until present.  $N_a$  varied between 1000 and 20000, such that both expansions and contractions were studied. We simulated two scenarios: one without admixture and one with admixture taking place  $G_a = 5$  generations ago, replacing a proportion  $1 - \alpha = 0.3$  of the population. We then ran the admixture test as described in the main text and in Figure S10 (with 100 simulated constant-size populations). The results demonstrate that for all values of  $N_a$  tested, while for the no-admixture case, the test always resulted in an insignificant P-value, for the admixture case, the P-value was always below 0.05. We note, however, that it might be that a more extreme or complex demographic history will confound the admixture test; but at least for the parameters investigated here, the admixture test is robust. (B) The effect of IBD detection errors. We simulated populations of constant size  $N$  and dropped each detected IBD segment with probability  $\epsilon = 0.2$  (as in the error model of *The total sharing distribution and an error model* section of the main text). Again, we simulated two scenarios: with and without admixture (same parameters as in (A)). We then ran the admixture test, and as in (A), the resulting P-values were significant only for the truly admixed populations.
